# Supplementary material
Source: publisher figshare collection journal article supplement (https://sage.figshare.com/ndownloader/files/22782101)
Supplement: Supplementary file 1 [file 22782101]

## Sheet: Enrichment
GroupID	Category	Term	Description	LogP	Log(q-value)	InTerm_InList	Symbols
1_Summary	GO Biological Processes	GO:0030155	regulation of cell adhesion	-11.6076	-7.26147	24/686	Adam19,Adam8,Runx3,Cd44,Ccr2,Fgl2,Fn1,H2-Aa,H2-Ab1,Cd74,Il1b,Itgal,Lgals3,Mbp,Ptger4,Ptpn22,Rara,Slfn1,Vav3,Dock5,Flna,Cytip,Emilin2,Kif14,Itgb7,Apoe,Axl,Fgr,Slamf7,Cd300lb,Plcb1,Ezr,Samhd1,Clec4e,Anxa2,Pirb,Alcam,Cd93,Ace,Flt1,Pim1,Hmgb2,Gapt,Slfn2,Tgfbr3,Xdh
1_Member	GO Biological Processes	GO:0030155	regulation of cell adhesion	-11.6076	-7.26147	24/686	Adam19,Adam8,Runx3,Cd44,Ccr2,Fgl2,Fn1,H2-Aa,H2-Ab1,Cd74,Il1b,Itgal,Lgals3,Mbp,Ptger4,Ptpn22,Rara,Slfn1,Vav3,Dock5,Flna,Cytip,Emilin2,Kif14
1_Member	GO Biological Processes	GO:0045785	positive regulation of cell adhesion	-10.2913	-6.42232	18/412	Adam19,Adam8,Runx3,Cd44,Ccr2,Fn1,H2-Aa,H2-Ab1,Cd74,Il1b,Itgal,Ptger4,Ptpn22,Rara,Vav3,Dock5,Flna,Emilin2
1_Member	GO Biological Processes	GO:0007159	leukocyte cell-cell adhesion	-9.06706	-5.49907	15/319	Adam8,Runx3,Cd44,Ccr2,Fgl2,H2-Aa,H2-Ab1,Cd74,Il1b,Itgal,Itgb7,Lgals3,Ptpn22,Rara,Slfn1
1_Member	GO Biological Processes	GO:0022407	regulation of cell-cell adhesion	-8.72347	-5.25071	16/394	Adam19,Adam8,Runx3,Cd44,Ccr2,Fgl2,H2-Aa,H2-Ab1,Cd74,Il1b,Itgal,Lgals3,Mbp,Ptpn22,Rara,Slfn1
1_Member	GO Biological Processes	GO:1903037	regulation of leukocyte cell-cell adhesion	-8.69376	-5.25071	14/287	Adam8,Runx3,Cd44,Ccr2,Fgl2,H2-Aa,H2-Ab1,Cd74,Il1b,Itgal,Lgals3,Ptpn22,Rara,Slfn1
1_Member	GO Biological Processes	GO:0050866	negative regulation of cell activation	-8.44672	-5.07255	12/203	Apoe,Runx3,Cd44,Ccr2,Fgl2,H2-Aa,H2-Ab1,Cd74,Lgals3,Ptpn22,Slfn1,Axl
1_Member	GO Biological Processes	GO:0050863	regulation of T cell activation	-8.31844	-5.0137	14/307	Adam8,Runx3,Cd44,Ccr2,Fgl2,H2-Aa,H2-Ab1,Cd74,Il1b,Itgal,Lgals3,Ptpn22,Rara,Slfn1
1_Member	GO Biological Processes	GO:0050865	regulation of cell activation	-8.18394	-4.9477	20/699	Adam8,Apoe,Runx3,Cd44,Ccr2,Fgl2,Fgr,H2-Aa,H2-Ab1,Cd74,Il1b,Itgal,Lgals3,Ptpn22,Rara,Slfn1,Axl,Vav3,Slamf7,Cd300lb
1_Member	GO Biological Processes	GO:1903038	negative regulation of leukocyte cell-cell adhesion	-8.17989	-4.9477	10/131	Adam8,Runx3,Cd44,Fgl2,H2-Aa,H2-Ab1,Cd74,Lgals3,Ptpn22,Slfn1
1_Member	GO Biological Processes	GO:0002695	negative regulation of leukocyte activation	-7.88149	-4.71145	11/182	Runx3,Cd44,Ccr2,Fgl2,H2-Aa,H2-Ab1,Cd74,Lgals3,Ptpn22,Slfn1,Axl
1_Member	GO Biological Processes	GO:0002694	regulation of leukocyte activation	-7.85039	-4.70838	19/658	Adam8,Runx3,Cd44,Ccr2,Fgl2,Fgr,H2-Aa,H2-Ab1,Cd74,Il1b,Itgal,Lgals3,Ptpn22,Rara,Slfn1,Axl,Vav3,Slamf7,Cd300lb
1_Member	GO Biological Processes	GO:0022408	negative regulation of cell-cell adhesion	-7.78345	-4.68838	11/186	Adam8,Runx3,Cd44,Fgl2,H2-Aa,H2-Ab1,Cd74,Lgals3,Mbp,Ptpn22,Slfn1
1_Member	GO Biological Processes	GO:0002683	negative regulation of immune system process	-7.64049	-4.61657	16/470	Runx3,Cd44,Ccr2,Fgl2,H2-Aa,H2-Ab1,Cd74,Lgals3,Plcb1,Ptger4,Ptpn22,Rara,Slfn1,Ezr,Axl,Samhd1
1_Member	GO Biological Processes	GO:0022409	positive regulation of cell-cell adhesion	-7.59252	-4.5888	12/242	Adam19,Adam8,Runx3,Cd44,Ccr2,H2-Aa,H2-Ab1,Cd74,Il1b,Itgal,Ptpn22,Rara
1_Member	GO Biological Processes	GO:0051250	negative regulation of lymphocyte activation	-7.55846	-4.57405	10/152	Runx3,Cd44,Fgl2,H2-Aa,H2-Ab1,Cd74,Lgals3,Ptpn22,Slfn1,Axl
1_Member	GO Biological Processes	GO:1903039	positive regulation of leukocyte cell-cell adhesion	-7.39164	-4.46543	11/203	Adam8,Runx3,Cd44,Ccr2,H2-Aa,H2-Ab1,Cd74,Il1b,Itgal,Ptpn22,Rara
1_Member	GO Biological Processes	GO:0051249	regulation of lymphocyte activation	-7.39099	-4.46543	17/558	Adam8,Runx3,Cd44,Ccr2,Fgl2,H2-Aa,H2-Ab1,Cd74,Il1b,Itgal,Lgals3,Ptpn22,Rara,Slfn1,Axl,Vav3,Slamf7
1_Member	GO Biological Processes	GO:0050868	negative regulation of T cell activation	-7.37564	-4.46543	9/119	Runx3,Cd44,Fgl2,H2-Aa,H2-Ab1,Cd74,Lgals3,Ptpn22,Slfn1
1_Member	GO Biological Processes	GO:0042110	T cell activation	-7.32885	-4.44511	16/495	Adam8,Runx3,Cd44,Ccr2,Fgl2,H2-Aa,H2-Ab1,Cd74,Il1b,Itgal,Lgals3,Ptger4,Ptpn22,Rara,Slfn1,Clec4e
1_Member	GO Biological Processes	GO:0002521	leukocyte differentiation	-7.24661	-4.40562	17/571	Adam8,Anxa2,Runx3,Cd44,Ccr2,Fgl2,H2-Aa,H2-Ab1,Cd74,Il1b,Pirb,Plcb1,Ptger4,Ptpn22,Rara,Axl,Clec4e
1_Member	GO Biological Processes	GO:0098609	cell-cell adhesion	-7.20226	-4.37464	19/723	Adam19,Adam8,Alcam,Runx3,Cd44,Ccr2,Fgl2,H2-Aa,H2-Ab1,Cd74,Il1b,Itgal,Itgb7,Lgals3,Cd93,Mbp,Ptpn22,Rara,Slfn1
1_Member	GO Biological Processes	GO:0030217	T cell differentiation	-7.03558	-4.24574	12/272	Adam8,Runx3,Cd44,Ccr2,Fgl2,H2-Aa,Cd74,Il1b,Ptger4,Ptpn22,Rara,Clec4e
1_Member	GO Biological Processes	GO:0050670	regulation of lymphocyte proliferation	-6.93629	-4.15835	11/225	Cd44,Ccr2,H2-Aa,H2-Ab1,Cd74,Il1b,Itgal,Lgals3,Ptpn22,Slfn1,Vav3
1_Member	GO Biological Processes	GO:0030098	lymphocyte differentiation	-6.90805	-4.14235	14/398	Adam8,Runx3,Cd44,Ccr2,Fgl2,H2-Aa,H2-Ab1,Cd74,Il1b,Ptger4,Ptpn22,Rara,Axl,Clec4e
1_Member	GO Biological Processes	GO:0032944	regulation of mononuclear cell proliferation	-6.89742	-4.14235	11/227	Cd44,Ccr2,H2-Aa,H2-Ab1,Cd74,Il1b,Itgal,Lgals3,Ptpn22,Slfn1,Vav3
1_Member	GO Biological Processes	GO:1903706	regulation of hemopoiesis	-6.77649	-4.0536	14/408	Ace,Adam8,Runx3,Cd44,Ccr2,Fgl2,Flt1,H2-Aa,Cd74,Il1b,Pim1,Rara,Axl,Hmgb2
1_Member	GO Biological Processes	GO:0045619	regulation of lymphocyte differentiation	-6.75342	-4.04075	10/185	Adam8,Runx3,Cd44,Ccr2,Fgl2,H2-Aa,Cd74,Il1b,Rara,Axl
1_Member	GO Biological Processes	GO:0050870	positive regulation of T cell activation	-6.70992	-4.00724	10/187	Adam8,Runx3,Ccr2,H2-Aa,H2-Ab1,Cd74,Il1b,Itgal,Ptpn22,Rara
1_Member	GO Biological Processes	GO:0070663	regulation of leukocyte proliferation	-6.69039	-3.99747	11/238	Cd44,Ccr2,H2-Aa,H2-Ab1,Cd74,Il1b,Itgal,Lgals3,Ptpn22,Slfn1,Vav3
1_Member	GO Biological Processes	GO:0045621	positive regulation of lymphocyte differentiation	-6.54138	-3.86916	8/108	Adam8,Runx3,Ccr2,H2-Aa,Cd74,Il1b,Rara,Axl
1_Member	GO Biological Processes	GO:0046651	lymphocyte proliferation	-6.45385	-3.80668	12/308	Cd44,Ccr2,H2-Aa,H2-Ab1,Cd74,Il1b,Itgal,Lgals3,Ptpn22,Slfn1,Vav3,Gapt
1_Member	GO Biological Processes	GO:0045580	regulation of T cell differentiation	-6.43694	-3.79838	9/153	Adam8,Runx3,Cd44,Ccr2,Fgl2,H2-Aa,Cd74,Il1b,Rara
1_Member	GO Biological Processes	GO:0032943	mononuclear cell proliferation	-6.42387	-3.79374	12/310	Cd44,Ccr2,H2-Aa,H2-Ab1,Cd74,Il1b,Itgal,Lgals3,Ptpn22,Slfn1,Vav3,Gapt
1_Member	GO Biological Processes	GO:0002696	positive regulation of leukocyte activation	-6.28626	-3.68472	14/448	Adam8,Runx3,Ccr2,Fgr,H2-Aa,H2-Ab1,Cd74,Il1b,Itgal,Ptpn22,Rara,Axl,Vav3,Cd300lb
1_Member	GO Biological Processes	GO:1903708	positive regulation of hemopoiesis	-6.28267	-3.68472	10/208	Adam8,Runx3,Ccr2,Flt1,H2-Aa,Cd74,Il1b,Rara,Axl,Hmgb2
1_Member	GO Biological Processes	GO:0070661	leukocyte proliferation	-6.13604	-3.56805	12/330	Cd44,Ccr2,H2-Aa,H2-Ab1,Cd74,Il1b,Itgal,Lgals3,Ptpn22,Slfn1,Vav3,Gapt
1_Member	GO Biological Processes	GO:0050867	positive regulation of cell activation	-6.11584	-3.55503	14/463	Adam8,Runx3,Ccr2,Fgr,H2-Aa,H2-Ab1,Cd74,Il1b,Itgal,Ptpn22,Rara,Axl,Vav3,Cd300lb
1_Member	GO Biological Processes	GO:0042129	regulation of T cell proliferation	-6.05157	-3.51161	9/170	Cd44,Ccr2,H2-Aa,H2-Ab1,Il1b,Itgal,Lgals3,Ptpn22,Slfn1
1_Member	GO Biological Processes	GO:0007162	negative regulation of cell adhesion	-5.94508	-3.41849	11/283	Adam8,Runx3,Cd44,Fgl2,H2-Aa,H2-Ab1,Cd74,Lgals3,Mbp,Ptpn22,Slfn1
1_Member	GO Biological Processes	GO:0045582	positive regulation of T cell differentiation	-5.77035	-3.27547	7/95	Adam8,Runx3,Ccr2,H2-Aa,Cd74,Il1b,Rara
1_Member	GO Biological Processes	GO:0042098	T cell proliferation	-5.36262	-2.90858	9/206	Cd44,Ccr2,H2-Aa,H2-Ab1,Il1b,Itgal,Lgals3,Ptpn22,Slfn1
1_Member	GO Biological Processes	GO:0051251	positive regulation of lymphocyte activation	-5.33783	-2.89478	12/394	Adam8,Runx3,Ccr2,H2-Aa,H2-Ab1,Cd74,Il1b,Itgal,Ptpn22,Rara,Axl,Vav3
1_Member	GO Biological Processes	GO:1902107	positive regulation of leukocyte differentiation	-5.09453	-2.70334	8/168	Adam8,Runx3,Ccr2,H2-Aa,Cd74,Il1b,Rara,Axl
1_Member	GO Biological Processes	GO:1902105	regulation of leukocyte differentiation	-4.90118	-2.54181	10/297	Adam8,Runx3,Cd44,Ccr2,Fgl2,H2-Aa,Cd74,Il1b,Rara,Axl
1_Member	GO Biological Processes	GO:0008285	negative regulation of cell proliferation	-3.63957	-1.54828	13/680	Apoe,Runx3,Cd44,Flt1,H2-Aa,H2-Ab1,Il1b,Lgals3,Rara,Slfn1,Slfn2,Tgfbr3,Xdh
1_Member	GO Biological Processes	GO:0042130	negative regulation of T cell proliferation	-3.07684	-1.16367	4/70	Cd44,H2-Aa,H2-Ab1,Slfn1
1_Member	GO Biological Processes	GO:0032945	negative regulation of mononuclear cell proliferation	-2.78172	-0.93801	4/84	Cd44,H2-Aa,H2-Ab1,Slfn1
1_Member	GO Biological Processes	GO:0050672	negative regulation of lymphocyte proliferation	-2.78172	-0.93801	4/84	Cd44,H2-Aa,H2-Ab1,Slfn1
1_Member	GO Biological Processes	GO:0070664	negative regulation of leukocyte proliferation	-2.70745	-0.890876	4/88	Cd44,H2-Aa,H2-Ab1,Slfn1
2_Summary	GO Cellular Components	GO:0098552	side of membrane	-10.6761	-6.63096	24/760	Ace,Adam19,Alcam,Anxa5,Apoe,Cxcr5,Capn2,Cd44,Ccr2,Fgr,Gsr,H2-Aa,H2-Ab1,Cd74,Itgal,Kcnab2,Lgals3,Ptpn22,S100a6,Sema7a,Tgfbr3,Ezr,Slamf7,Hip1
2_Member	GO Cellular Components	GO:0098552	side of membrane	-10.6761	-6.63096	24/760	Ace,Adam19,Alcam,Anxa5,Apoe,Cxcr5,Capn2,Cd44,Ccr2,Fgr,Gsr,H2-Aa,H2-Ab1,Cd74,Itgal,Kcnab2,Lgals3,Ptpn22,S100a6,Sema7a,Tgfbr3,Ezr,Slamf7,Hip1
2_Member	GO Cellular Components	GO:0009897	external side of plasma membrane	-7.90753	-4.71145	18/582	Ace,Adam19,Alcam,Anxa5,Apoe,Cxcr5,Capn2,Cd44,Ccr2,Gsr,H2-Aa,H2-Ab1,Cd74,Itgal,Lgals3,Sema7a,Tgfbr3,Slamf7
3_Summary	GO Biological Processes	GO:0031347	regulation of defense response	-9.66451	-5.92044	21/639	Ace,Adam8,Apoe,Cd44,Ccr2,Fgl2,Fgr,Ifi203,Cd74,Il1b,Ptger4,Ptpn22,Sema7a,Mefv,Samhd1,Clec4e,Rftn1,Hmgb2,Treml4,Ifi209,Mndal,H2-Ab1,Lgals3,Rara,Ezr,Vav3
3_Member	GO Biological Processes	GO:0031347	regulation of defense response	-9.66451	-5.92044	21/639	Ace,Adam8,Apoe,Cd44,Ccr2,Fgl2,Fgr,Ifi203,Cd74,Il1b,Ptger4,Ptpn22,Sema7a,Mefv,Samhd1,Clec4e,Rftn1,Hmgb2,Treml4,Ifi209,Mndal
3_Member	GO Biological Processes	GO:0045088	regulation of innate immune response	-7.75577	-4.68838	13/285	Adam8,Apoe,Fgr,Ifi203,Cd74,Ptpn22,Samhd1,Clec4e,Rftn1,Hmgb2,Treml4,Ifi209,Mndal
3_Member	GO Biological Processes	GO:0050778	positive regulation of immune response	-7.70187	-4.65676	20/747	Adam8,Cd44,Ccr2,Fgr,H2-Ab1,Ifi203,Cd74,Il1b,Lgals3,Ptpn22,Rara,Sema7a,Ezr,Clec4e,Vav3,Rftn1,Hmgb2,Treml4,Ifi209,Mndal
3_Member	GO Biological Processes	GO:0031349	positive regulation of defense response	-7.28372	-4.42895	14/371	Ace,Adam8,Ccr2,Ifi203,Cd74,Il1b,Ptger4,Ptpn22,Clec4e,Rftn1,Hmgb2,Treml4,Ifi209,Mndal
3_Member	GO Biological Processes	GO:0045089	positive regulation of innate immune response	-5.85083	-3.34355	10/232	Adam8,Ifi203,Cd74,Ptpn22,Clec4e,Rftn1,Hmgb2,Treml4,Ifi209,Mndal
3_Member	GO Biological Processes	GO:0002218	activation of innate immune response	-4.21679	-1.99123	7/164	Ifi203,Ptpn22,Clec4e,Rftn1,Treml4,Ifi209,Mndal
3_Member	GO Biological Processes	GO:0002253	activation of immune response	-3.4754	-1.43246	11/526	Ifi203,Il1b,Lgals3,Ptpn22,Ezr,Clec4e,Vav3,Rftn1,Treml4,Ifi209,Mndal
3_Member	GO Biological Processes	GO:0002221	pattern recognition receptor signaling pathway	-2.02507	-0.389053	4/137	Ptpn22,Clec4e,Rftn1,Treml4
3_Member	GO Biological Processes	GO:0002758	innate immune response-activating signal transduction	-2.00357	-0.374275	4/139	Ptpn22,Clec4e,Rftn1,Treml4
4_Summary	GO Biological Processes	GO:0001816	cytokine production	-9.15423	-5.50707	22/753	Adam8,Capn2,Runx3,Ccr2,Cybb,Fgr,Fn1,Cd74,Il1b,Mbp,Plcb1,Ptger4,Ptpn22,Rara,Sema7a,Ezr,Axl,Mefv,Clec4e,Rftn1,Hmgb2,Mndal,Ace,Anxa5,Apoe,Cyp4f18,Lmnb1,Tgfbr3,Xdh,Ccdc88c,Lgals3,Anxa2,Clic4,Rab3d,Fgl2,Treml4,Flna,Vim,Atp1a3
4_Member	GO Biological Processes	GO:0001816	cytokine production	-9.15423	-5.50707	22/753	Adam8,Capn2,Runx3,Ccr2,Cybb,Fgr,Fn1,Cd74,Il1b,Mbp,Plcb1,Ptger4,Ptpn22,Rara,Sema7a,Ezr,Axl,Mefv,Clec4e,Rftn1,Hmgb2,Mndal
4_Member	GO Biological Processes	GO:0001817	regulation of cytokine production	-8.41869	-5.07255	20/677	Adam8,Capn2,Ccr2,Cybb,Fgr,Fn1,Cd74,Il1b,Mbp,Plcb1,Ptger4,Ptpn22,Rara,Sema7a,Ezr,Axl,Mefv,Clec4e,Hmgb2,Mndal
4_Member	GO Biological Processes	GO:0001819	positive regulation of cytokine production	-7.11796	-4.3033	15/446	Adam8,Ccr2,Cybb,Fgr,Cd74,Il1b,Mbp,Plcb1,Ptger4,Ptpn22,Rara,Sema7a,Clec4e,Hmgb2,Mndal
4_Member	GO Biological Processes	GO:0051048	negative regulation of secretion	-6.29089	-3.68472	11/261	Ace,Anxa5,Apoe,Ccr2,Fn1,Cd74,Il1b,Ptger4,Ptpn22,Ezr,Cyp4f18
4_Member	GO Biological Processes	GO:0002792	negative regulation of peptide secretion	-5.21066	-2.79394	8/162	Anxa5,Apoe,Fn1,Cd74,Il1b,Ptger4,Ptpn22,Ezr
4_Member	GO Biological Processes	GO:0050709	negative regulation of protein secretion	-4.42657	-2.14489	7/152	Anxa5,Apoe,Fn1,Il1b,Ptger4,Ptpn22,Ezr
4_Member	GO Biological Processes	GO:0050707	regulation of cytokine secretion	-4.36611	-2.09185	8/212	Fgr,Fn1,Il1b,Mbp,Ptger4,Ptpn22,Ezr,Clec4e
4_Member	GO Biological Processes	GO:0031098	stress-activated protein kinase signaling cascade	-4.12919	-1.93228	9/295	Il1b,Lmnb1,Plcb1,Ptger4,Ptpn22,Tgfbr3,Ezr,Xdh,Ccdc88c
4_Member	GO Biological Processes	GO:1903531	negative regulation of secretion by cell	-4.09107	-1.9033	8/232	Anxa5,Apoe,Ccr2,Fn1,Il1b,Ptger4,Ptpn22,Ezr
4_Member	GO Biological Processes	GO:0051051	negative regulation of transport	-4.04795	-1.87208	12/533	Ace,Anxa5,Apoe,Ccr2,Fn1,Cd74,Il1b,Lgals3,Ptger4,Ptpn22,Ezr,Cyp4f18
4_Member	GO Biological Processes	GO:0050663	cytokine secretion	-3.95147	-1.79567	8/243	Fgr,Fn1,Il1b,Mbp,Ptger4,Ptpn22,Ezr,Clec4e
4_Member	GO Biological Processes	GO:1900744	regulation of p38MAPK cascade	-3.934	-1.78376	4/42	Il1b,Ptpn22,Ezr,Xdh
4_Member	GO Biological Processes	GO:0051403	stress-activated MAPK cascade	-3.72725	-1.61156	8/262	Il1b,Lmnb1,Plcb1,Ptger4,Ptpn22,Tgfbr3,Ezr,Xdh
4_Member	GO Biological Processes	GO:0038066	p38MAPK cascade	-3.67094	-1.56784	4/49	Il1b,Ptpn22,Ezr,Xdh
4_Member	GO Biological Processes	GO:0051224	negative regulation of protein transport	-3.64082	-1.54828	7/203	Anxa5,Apoe,Fn1,Il1b,Ptger4,Ptpn22,Ezr
4_Member	GO Biological Processes	GO:1904950	negative regulation of establishment of protein localization	-3.57645	-1.50677	7/208	Anxa5,Apoe,Fn1,Il1b,Ptger4,Ptpn22,Ezr
4_Member	GO Biological Processes	GO:0050715	positive regulation of cytokine secretion	-3.54715	-1.48204	6/149	Fgr,Il1b,Mbp,Ptger4,Ptpn22,Clec4e
4_Member	GO Biological Processes	GO:0002791	regulation of peptide secretion	-3.46843	-1.42764	11/527	Anxa5,Apoe,Fgr,Fn1,Cd74,Il1b,Mbp,Ptger4,Ptpn22,Ezr,Clec4e
4_Member	GO Biological Processes	GO:0045446	endothelial cell differentiation	-3.30895	-1.33388	5/108	Anxa2,Il1b,Ezr,Xdh,Clic4
4_Member	GO Biological Processes	GO:0002790	peptide secretion	-3.27181	-1.30588	12/648	Anxa5,Apoe,Fgr,Fn1,Cd74,Il1b,Mbp,Ptger4,Ptpn22,Rab3d,Ezr,Clec4e
4_Member	GO Biological Processes	GO:0032872	regulation of stress-activated MAPK cascade	-3.24706	-1.28473	7/236	Il1b,Lmnb1,Plcb1,Ptpn22,Tgfbr3,Ezr,Xdh
4_Member	GO Biological Processes	GO:0070302	regulation of stress-activated protein kinase signaling cascade	-3.22534	-1.2666	7/238	Il1b,Lmnb1,Plcb1,Ptpn22,Tgfbr3,Ezr,Xdh
4_Member	GO Biological Processes	GO:0050710	negative regulation of cytokine secretion	-3.14865	-1.21244	4/67	Fn1,Ptger4,Ptpn22,Ezr
4_Member	GO Biological Processes	GO:0050708	regulation of protein secretion	-3.13479	-1.20027	10/488	Anxa5,Apoe,Fgr,Fn1,Il1b,Mbp,Ptger4,Ptpn22,Ezr,Clec4e
4_Member	GO Biological Processes	GO:0003158	endothelium development	-3.08458	-1.16819	5/121	Anxa2,Il1b,Ezr,Xdh,Clic4
4_Member	GO Biological Processes	GO:0001818	negative regulation of cytokine production	-3.01971	-1.11448	7/258	Fn1,Ptger4,Ptpn22,Rara,Ezr,Axl,Mefv
4_Member	GO Biological Processes	GO:0009306	protein secretion	-2.98505	-1.09528	11/603	Anxa5,Apoe,Fgr,Fn1,Il1b,Mbp,Ptger4,Ptpn22,Rab3d,Ezr,Clec4e
4_Member	GO Biological Processes	GO:0050688	regulation of defense response to virus	-2.92178	-1.04251	4/77	Fgl2,Il1b,Ptpn22,Treml4
4_Member	GO Biological Processes	GO:0051047	positive regulation of secretion	-2.88275	-1.01228	10/527	Fgr,Il1b,Lgals3,Mbp,Ptger4,Ptpn22,Rab3d,Ezr,Clec4e,Cyp4f18
4_Member	GO Biological Processes	GO:0007254	JNK cascade	-2.81081	-0.954631	6/206	Il1b,Lmnb1,Plcb1,Ptger4,Ptpn22,Tgfbr3
4_Member	GO Biological Processes	GO:0090087	regulation of peptide transport	-2.74636	-0.909424	12/746	Anxa5,Apoe,Fgr,Fn1,Cd74,Il1b,Mbp,Ptger4,Ptpn22,Ezr,Clec4e,Flna
4_Member	GO Biological Processes	GO:0050691	regulation of defense response to virus by host	-2.68861	-0.879031	3/42	Il1b,Ptpn22,Treml4
4_Member	GO Biological Processes	GO:1903532	positive regulation of secretion by cell	-2.65575	-0.858611	9/472	Fgr,Il1b,Lgals3,Mbp,Ptger4,Ptpn22,Rab3d,Ezr,Clec4e
4_Member	GO Biological Processes	GO:0050714	positive regulation of protein secretion	-2.64565	-0.849745	7/300	Fgr,Il1b,Mbp,Ptger4,Ptpn22,Ezr,Clec4e
4_Member	GO Biological Processes	GO:0072604	interleukin-6 secretion	-2.57485	-0.786654	3/46	Il1b,Mbp,Ptpn22
4_Member	GO Biological Processes	GO:0051223	regulation of protein transport	-2.45517	-0.702315	11/705	Anxa5,Apoe,Fgr,Fn1,Il1b,Mbp,Ptger4,Ptpn22,Ezr,Clec4e,Flna
4_Member	GO Biological Processes	GO:0002064	epithelial cell development	-2.42711	-0.678999	6/246	Il1b,Rara,Ezr,Vim,Clic4,Flna
4_Member	GO Biological Processes	GO:0002793	positive regulation of peptide secretion	-2.42406	-0.678999	7/329	Fgr,Il1b,Mbp,Ptger4,Ptpn22,Ezr,Clec4e
4_Member	GO Biological Processes	GO:0051222	positive regulation of protein transport	-2.33101	-0.608125	8/433	Fgr,Il1b,Mbp,Ptger4,Ptpn22,Ezr,Clec4e,Flna
4_Member	GO Biological Processes	GO:0070201	regulation of establishment of protein localization	-2.31134	-0.592885	11/737	Anxa5,Apoe,Fgr,Fn1,Il1b,Mbp,Ptger4,Ptpn22,Ezr,Clec4e,Flna
4_Member	GO Biological Processes	GO:0032677	regulation of interleukin-8 production	-2.22827	-0.529514	3/61	Il1b,Ptger4,Ptpn22
4_Member	GO Biological Processes	GO:0046328	regulation of JNK cascade	-2.22389	-0.527089	5/191	Il1b,Lmnb1,Plcb1,Ptpn22,Tgfbr3
4_Member	GO Biological Processes	GO:1904951	positive regulation of establishment of protein localization	-2.22131	-0.525476	8/452	Fgr,Il1b,Mbp,Ptger4,Ptpn22,Ezr,Clec4e,Flna
4_Member	GO Biological Processes	GO:0001885	endothelial cell development	-2.11537	-0.45116	3/67	Il1b,Ezr,Clic4
4_Member	GO Biological Processes	GO:0032637	interleukin-8 production	-2.11537	-0.45116	3/67	Il1b,Ptger4,Ptpn22
4_Member	GO Biological Processes	GO:1901653	cellular response to peptide	-2.10731	-0.445123	6/287	Anxa5,Il1b,Plcb1,Ptpn22,Vim,Atp1a3
4_Member	GO Biological Processes	GO:0043407	negative regulation of MAP kinase activity	-2.08023	-0.426055	3/69	Apoe,Il1b,Ptpn22
4_Member	GO Biological Processes	GO:1901652	response to peptide	-2.06666	-0.416006	7/384	Anxa5,Il1b,Plcb1,Ptpn22,Tgfbr3,Vim,Atp1a3
5_Summary	GO Biological Processes	GO:0050900	leukocyte migration	-7.75668	-4.68838	14/340	Adam8,Cxcr5,Ccr2,Flt1,Cd74,Il1b,Itgb7,Lgals3,Plcb1,Ptger4,Ptpn22,Pla2g7,Vav3,Retnlg,Alcam,Runx3,Fn1,Lsp1,Sema7a,Hmgb2,Ace,Apoe,Anxa2,Cybb,Tgfbr3,Xdh,Clic4,Flna,Fgr,Dock5,Glipr2
5_Member	GO Biological Processes	GO:0050900	leukocyte migration	-7.75668	-4.68838	14/340	Adam8,Cxcr5,Ccr2,Flt1,Cd74,Il1b,Itgb7,Lgals3,Plcb1,Ptger4,Ptpn22,Pla2g7,Vav3,Retnlg
5_Member	GO Biological Processes	GO:0097529	myeloid leukocyte migration	-7.30481	-4.43579	11/207	Adam8,Ccr2,Flt1,Cd74,Il1b,Lgals3,Plcb1,Ptger4,Pla2g7,Vav3,Retnlg
5_Member	GO Biological Processes	GO:0006935	chemotaxis	-6.23969	-3.64942	16/596	Adam8,Alcam,Cxcr5,Runx3,Ccr2,Flt1,Fn1,Cd74,Il1b,Lgals3,Lsp1,Sema7a,Pla2g7,Vav3,Hmgb2,Retnlg
5_Member	GO Biological Processes	GO:0042330	taxis	-6.21087	-3.63157	16/599	Adam8,Alcam,Cxcr5,Runx3,Ccr2,Flt1,Fn1,Cd74,Il1b,Lgals3,Lsp1,Sema7a,Pla2g7,Vav3,Hmgb2,Retnlg
5_Member	GO Biological Processes	GO:0030595	leukocyte chemotaxis	-6.20686	-3.63157	10/212	Adam8,Cxcr5,Ccr2,Flt1,Cd74,Il1b,Lgals3,Pla2g7,Vav3,Retnlg
5_Member	GO Biological Processes	GO:0048514	blood vessel morphogenesis	-5.99579	-3.46257	16/622	Ace,Adam8,Apoe,Anxa2,Ccr2,Cybb,Flt1,Fn1,Il1b,Lgals3,Ptger4,Tgfbr3,Xdh,Clic4,Vav3,Flna
5_Member	GO Biological Processes	GO:0060326	cell chemotaxis	-5.69868	-3.20987	11/300	Adam8,Cxcr5,Ccr2,Flt1,Cd74,Il1b,Lgals3,Pla2g7,Vav3,Hmgb2,Retnlg
5_Member	GO Biological Processes	GO:0002685	regulation of leukocyte migration	-5.44972	-2.97865	9/201	Adam8,Ccr2,Cd74,Il1b,Lgals3,Plcb1,Ptger4,Ptpn22,Pla2g7
5_Member	GO Biological Processes	GO:0030335	positive regulation of cell migration	-5.36397	-2.90858	14/537	Adam8,Ccr2,Fgr,Flt1,Fn1,Cd74,Il1b,Lgals3,Ptger4,Sema7a,Pla2g7,Dock5,Flna,Glipr2
5_Member	GO Biological Processes	GO:0001568	blood vessel development	-5.18847	-2.77683	16/719	Ace,Adam8,Apoe,Anxa2,Ccr2,Cybb,Flt1,Fn1,Il1b,Lgals3,Ptger4,Tgfbr3,Xdh,Clic4,Vav3,Flna
5_Member	GO Biological Processes	GO:2000147	positive regulation of cell motility	-5.16498	-2.75836	14/559	Adam8,Ccr2,Fgr,Flt1,Fn1,Cd74,Il1b,Lgals3,Ptger4,Sema7a,Pla2g7,Dock5,Flna,Glipr2
5_Member	GO Biological Processes	GO:0051272	positive regulation of cellular component movement	-5.01788	-2.63987	14/576	Adam8,Ccr2,Fgr,Flt1,Fn1,Cd74,Il1b,Lgals3,Ptger4,Sema7a,Pla2g7,Dock5,Flna,Glipr2
5_Member	GO Biological Processes	GO:0001944	vasculature development	-4.95252	-2.58865	16/751	Ace,Adam8,Apoe,Anxa2,Ccr2,Cybb,Flt1,Fn1,Il1b,Lgals3,Ptger4,Tgfbr3,Xdh,Clic4,Vav3,Flna
5_Member	GO Biological Processes	GO:0040017	positive regulation of locomotion	-4.89259	-2.53768	14/591	Adam8,Ccr2,Fgr,Flt1,Fn1,Cd74,Il1b,Lgals3,Ptger4,Sema7a,Pla2g7,Dock5,Flna,Glipr2
5_Member	GO Biological Processes	GO:0072358	cardiovascular system development	-4.86042	-2.50992	16/764	Ace,Adam8,Apoe,Anxa2,Ccr2,Cybb,Flt1,Fn1,Il1b,Lgals3,Ptger4,Tgfbr3,Xdh,Clic4,Vav3,Flna
5_Member	GO Biological Processes	GO:0002687	positive regulation of leukocyte migration	-4.5772	-2.25226	7/144	Adam8,Ccr2,Cd74,Il1b,Lgals3,Ptger4,Pla2g7
5_Member	GO Biological Processes	GO:1902624	positive regulation of neutrophil migration	-4.30054	-2.04782	4/34	Adam8,Cd74,Il1b,Ptger4
5_Member	GO Biological Processes	GO:0001525	angiogenesis	-4.20563	-1.9857	12/513	Ace,Adam8,Anxa2,Ccr2,Cybb,Flt1,Fn1,Il1b,Lgals3,Clic4,Vav3,Flna
5_Member	GO Biological Processes	GO:1990266	neutrophil migration	-4.08089	-1.89612	6/119	Adam8,Cd74,Il1b,Lgals3,Ptger4,Vav3
5_Member	GO Biological Processes	GO:1902622	regulation of neutrophil migration	-3.934	-1.78376	4/42	Adam8,Cd74,Il1b,Ptger4
5_Member	GO Biological Processes	GO:0097530	granulocyte migration	-3.59473	-1.52044	6/146	Adam8,Cd74,Il1b,Lgals3,Ptger4,Vav3
5_Member	GO Biological Processes	GO:0032103	positive regulation of response to external stimulus	-3.21161	-1.25771	8/313	Ace,Adam8,Ccr2,Fn1,Cd74,Il1b,Ptger4,Pla2g7
5_Member	GO Biological Processes	GO:0050729	positive regulation of inflammatory response	-2.76156	-0.91921	5/143	Ace,Adam8,Ccr2,Il1b,Ptger4
5_Member	GO Biological Processes	GO:0030593	neutrophil chemotaxis	-2.50567	-0.740455	4/100	Cd74,Il1b,Lgals3,Vav3
5_Member	GO Biological Processes	GO:1901342	regulation of vasculature development	-2.34652	-0.619475	7/340	Ccr2,Cybb,Flt1,Il1b,Lgals3,Ptger4,Xdh
5_Member	GO Biological Processes	GO:0071621	granulocyte chemotaxis	-2.1868	-0.502474	4/123	Cd74,Il1b,Lgals3,Vav3
6_Summary	GO Molecular Functions	GO:0003779	actin binding	-7.37826	-4.46543	15/426	Ace,Gas7,Lsp1,Fxyd5,Plec,Pstpip1,Tmsb10,Ezr,Msrb1,Mefv,Syne1,Flna,Hip1,Tpm4,Iqgap2,Adam8,Anxa2,Fgr,Flt1,Gbp2,Rara,Ahnak,Apoe,Gda,Ptger4,Vim,Ccdc88c,Kif14
6_Member	GO Molecular Functions	GO:0003779	actin binding	-7.37826	-4.46543	15/426	Ace,Gas7,Lsp1,Fxyd5,Plec,Pstpip1,Tmsb10,Ezr,Msrb1,Mefv,Syne1,Flna,Hip1,Tpm4,Iqgap2
6_Member	GO Cellular Components	GO:0015629	actin cytoskeleton	-5.82538	-3.32434	14/490	Adam8,Anxa2,Fgr,Flt1,Gas7,Gbp2,Pstpip1,Rara,Ezr,Msrb1,Ahnak,Flna,Hip1,Tpm4
6_Member	GO Biological Processes	GO:0097435	supramolecular fiber organization	-5.49525	-3.01835	16/680	Apoe,Anxa2,Gas7,Gda,Pstpip1,Ptger4,Tmsb10,Ezr,Vim,Msrb1,Ccdc88c,Flna,Hip1,Tpm4,Kif14,Iqgap2
6_Member	GO Molecular Functions	GO:0051015	actin filament binding	-4.57735	-2.25226	8/198	Gas7,Pstpip1,Ezr,Syne1,Flna,Hip1,Tpm4,Iqgap2
6_Member	GO Biological Processes	GO:0007015	actin filament organization	-3.78931	-1.65536	10/403	Gas7,Pstpip1,Ptger4,Tmsb10,Ezr,Msrb1,Flna,Hip1,Tpm4,Iqgap2
6_Member	GO Cellular Components	GO:0005884	actin filament	-3.06847	-1.15849	5/122	Gas7,Pstpip1,Ezr,Flna,Tpm4
6_Member	GO Biological Processes	GO:0030036	actin cytoskeleton organization	-2.66937	-0.866062	11/661	Fgr,Gas7,Pstpip1,Ptger4,Tmsb10,Ezr,Msrb1,Flna,Hip1,Tpm4,Iqgap2
6_Member	GO Cellular Components	GO:0032432	actin filament bundle	-2.58621	-0.795169	4/95	Anxa2,Pstpip1,Flna,Tpm4
6_Member	GO Biological Processes	GO:0030041	actin filament polymerization	-2.39372	-0.656489	5/174	Gas7,Pstpip1,Tmsb10,Msrb1,Iqgap2
6_Member	GO Biological Processes	GO:0030029	actin filament-based process	-2.28541	-0.577761	11/743	Fgr,Gas7,Pstpip1,Ptger4,Tmsb10,Ezr,Msrb1,Flna,Hip1,Tpm4,Iqgap2
6_Member	GO Biological Processes	GO:0051258	protein polymerization	-2.21714	-0.523248	6/272	Gas7,Gda,Pstpip1,Tmsb10,Msrb1,Iqgap2
6_Member	GO Cellular Components	GO:0030863	cortical cytoskeleton	-2.13846	-0.466263	4/127	Pstpip1,Flna,Hip1,Tpm4
6_Member	GO Biological Processes	GO:0008154	actin polymerization or depolymerization	-2.12355	-0.455935	5/202	Gas7,Pstpip1,Tmsb10,Msrb1,Iqgap2
7_Summary	GO Biological Processes	GO:0035456	response to interferon-beta	-7.36441	-4.46543	7/56	Gbp2,Ifi203,Ifitm2,Ifitm6,Ifi207,Ifi209,Mndal,Ciita,H2-Ab1,Sik1,Nhlh2,Pim1,Rara,Bhlhe40,Hmgb2,Flna
7_Member	GO Biological Processes	GO:0035456	response to interferon-beta	-7.36441	-4.46543	7/56	Gbp2,Ifi203,Ifitm2,Ifitm6,Ifi207,Ifi209,Mndal
7_Member	GO Biological Processes	GO:0035458	cellular response to interferon-beta	-5.09044	-2.70334	5/46	Gbp2,Ifi203,Ifi207,Ifi209,Mndal
7_Member	GO Molecular Functions	GO:0008134	transcription factor binding	-3.54815	-1.48204	13/695	Ciita,H2-Ab1,Ifi203,Sik1,Nhlh2,Pim1,Rara,Bhlhe40,Hmgb2,Flna,Ifi207,Ifi209,Mndal
8_Summary	GO Biological Processes	GO:0070371	ERK1 and ERK2 cascade	-7.04024	-4.24574	13/328	Apoe,Cd44,Flt1,Fn1,Cd74,Il1b,Ptger4,Ptpn22,Rara,Sema7a,Tgfbr3,Ezr,Glipr2,Adam8,Lmnb1,Mbp,Plcb1,Xdh,Ace,Fgr,Pim1,Vav3,Kif14
8_Member	GO Biological Processes	GO:0070371	ERK1 and ERK2 cascade	-7.04024	-4.24574	13/328	Apoe,Cd44,Flt1,Fn1,Cd74,Il1b,Ptger4,Ptpn22,Rara,Sema7a,Tgfbr3,Ezr,Glipr2
8_Member	GO Biological Processes	GO:0070372	regulation of ERK1 and ERK2 cascade	-6.40897	-3.78711	12/311	Apoe,Cd44,Flt1,Fn1,Cd74,Il1b,Ptpn22,Rara,Sema7a,Tgfbr3,Ezr,Glipr2
8_Member	GO Biological Processes	GO:0000165	MAPK cascade	-5.86715	-3.35352	18/799	Adam8,Apoe,Cd44,Flt1,Fn1,Cd74,Il1b,Lmnb1,Mbp,Plcb1,Ptger4,Ptpn22,Rara,Sema7a,Tgfbr3,Ezr,Xdh,Glipr2
8_Member	GO Biological Processes	GO:0070374	positive regulation of ERK1 and ERK2 cascade	-5.11526	-2.71851	9/221	Apoe,Cd44,Flt1,Cd74,Il1b,Ptpn22,Rara,Sema7a,Glipr2
8_Member	GO Biological Processes	GO:0043408	regulation of MAPK cascade	-5.01753	-2.63987	16/742	Adam8,Apoe,Cd44,Flt1,Fn1,Cd74,Il1b,Lmnb1,Plcb1,Ptpn22,Rara,Sema7a,Tgfbr3,Ezr,Xdh,Glipr2
8_Member	GO Biological Processes	GO:0043410	positive regulation of MAPK cascade	-4.81936	-2.47754	13/520	Adam8,Apoe,Cd44,Flt1,Cd74,Il1b,Lmnb1,Plcb1,Ptpn22,Rara,Sema7a,Xdh,Glipr2
8_Member	GO Biological Processes	GO:0033674	positive regulation of kinase activity	-3.21079	-1.25771	10/477	Ace,Adam8,Cd44,Fgr,Flt1,Cd74,Il1b,Pim1,Vav3,Kif14
8_Member	GO Biological Processes	GO:0043549	regulation of kinase activity	-2.83022	-0.968382	12/729	Ace,Adam8,Apoe,Cd44,Fgr,Flt1,Cd74,Il1b,Pim1,Ptpn22,Vav3,Kif14
8_Member	GO Biological Processes	GO:0051347	positive regulation of transferase activity	-2.75147	-0.911841	10/549	Ace,Adam8,Cd44,Fgr,Flt1,Cd74,Il1b,Pim1,Vav3,Kif14
8_Member	GO Biological Processes	GO:0018108	peptidyl-tyrosine phosphorylation	-2.51258	-0.743939	7/317	Ace,Cd44,Fgr,Flt1,Cd74,Ptger4,Ptpn22
8_Member	GO Biological Processes	GO:0018212	peptidyl-tyrosine modification	-2.49005	-0.730501	7/320	Ace,Cd44,Fgr,Flt1,Cd74,Ptger4,Ptpn22
8_Member	GO Biological Processes	GO:0045859	regulation of protein kinase activity	-2.17337	-0.490937	10/663	Ace,Adam8,Apoe,Fgr,Flt1,Cd74,Il1b,Pim1,Ptpn22,Kif14
9_Summary	GO Biological Processes	GO:0034341	response to interferon-gamma	-6.84624	-4.10216	9/137	Ciita,Gbp2,H2-Aa,H2-Ab1,H2-Eb1,Vim,Mefv,Ifitm2,Ifitm6,Cd74,Fgl2,Ptpn22,Rftn1,Treml4,Apoe,Anxa2
9_Member	GO Biological Processes	GO:0034341	response to interferon-gamma	-6.84624	-4.10216	9/137	Ciita,Gbp2,H2-Aa,H2-Ab1,H2-Eb1,Vim,Mefv,Ifitm2,Ifitm6
9_Member	GO Cellular Components	GO:0042613	MHC class II protein complex	-6.81599	-4.08263	4/9	H2-Aa,H2-Ab1,H2-Eb1,Cd74
9_Member	GO Biological Processes	GO:0019882	antigen processing and presentation	-6.47982	-3.82388	8/110	Fgl2,H2-Aa,H2-Ab1,H2-Eb1,Cd74,Ptpn22,Rftn1,Treml4
9_Member	GO Biological Processes	GO:0019886	antigen processing and presentation of exogenous peptide antigen via MHC class II	-5.92603	-3.40597	4/14	H2-Aa,H2-Ab1,H2-Eb1,Cd74
9_Member	GO Biological Processes	GO:0002495	antigen processing and presentation of peptide antigen via MHC class II	-5.34819	-2.89968	4/19	H2-Aa,H2-Ab1,H2-Eb1,Cd74
9_Member	GO Biological Processes	GO:0002504	antigen processing and presentation of peptide or polysaccharide antigen via MHC class II	-5.2533	-2.82624	4/20	H2-Aa,H2-Ab1,H2-Eb1,Cd74
9_Member	GO Biological Processes	GO:0002577	regulation of antigen processing and presentation	-5.2533	-2.82624	4/20	Fgl2,H2-Ab1,Cd74,Ptpn22
9_Member	GO Cellular Components	GO:0042611	MHC protein complex	-4.99746	-2.62905	4/23	H2-Aa,H2-Ab1,H2-Eb1,Cd74
9_Member	GO Biological Processes	GO:0002478	antigen processing and presentation of exogenous peptide antigen	-4.84659	-2.50046	4/25	H2-Aa,H2-Ab1,H2-Eb1,Cd74
9_Member	GO Biological Processes	GO:0019884	antigen processing and presentation of exogenous antigen	-4.46296	-2.1699	4/31	H2-Aa,H2-Ab1,H2-Eb1,Cd74
9_Member	GO Biological Processes	GO:0048002	antigen processing and presentation of peptide antigen	-3.12432	-1.19482	4/68	H2-Aa,H2-Ab1,H2-Eb1,Cd74
9_Member	GO Cellular Components	GO:0005770	late endosome	-2.14129	-0.466324	5/200	Apoe,Anxa2,H2-Ab1,H2-Eb1,Cd74
10_Summary	GO Molecular Functions	GO:0034988	Fc-gamma receptor I complex binding	-6.67429	-3.99091	3/3	Fgr,Lgals3,Flna,Anxa5,Apoe,Aspm,Il1b,Plcb1,Tmsb10,Syne1
10_Member	GO Molecular Functions	GO:0034988	Fc-gamma receptor I complex binding	-6.67429	-3.99091	3/3	Fgr,Lgals3,Flna
10_Member	GO Biological Processes	GO:0051235	maintenance of location	-3.84103	-1.7044	9/322	Anxa5,Apoe,Aspm,Il1b,Lgals3,Plcb1,Tmsb10,Syne1,Flna
10_Member	GO Biological Processes	GO:0045185	maintenance of protein location	-2.38593	-0.651512	4/108	Lgals3,Tmsb10,Syne1,Flna
11_Summary	GO Biological Processes	GO:0042060	wound healing	-6.53405	-3.86916	13/363	Anxa5,Apoe,Anxa2,Cd44,Ccr2,F5,Fn1,Plec,Ptger4,Axl,F13a1,Flna,Myof,Fgr,Il1b,Itgal,Lgals3,Pstpip1,Rara,Ezr,Syne1,Hip1,Treml4,Rab3d,Plcb1,Pla2g7,Iqgap2,Xdh,Ace,Hmgb2,Olfm1
11_Member	GO Biological Processes	GO:0042060	wound healing	-6.53405	-3.86916	13/363	Anxa5,Apoe,Anxa2,Cd44,Ccr2,F5,Fn1,Plec,Ptger4,Axl,F13a1,Flna,Myof
11_Member	GO Biological Processes	GO:0009611	response to wounding	-5.00893	-2.63592	13/499	Anxa5,Apoe,Anxa2,Cd44,Ccr2,F5,Fn1,Plec,Ptger4,Axl,F13a1,Flna,Myof
11_Member	GO Biological Processes	GO:0006897	endocytosis	-3.84413	-1.7044	14/739	Apoe,Anxa2,Ccr2,Fgr,Il1b,Itgal,Lgals3,Pstpip1,Rara,Ezr,Axl,Syne1,Hip1,Treml4
11_Member	GO Biological Processes	GO:0030100	regulation of endocytosis	-3.43033	-1.40247	8/290	Apoe,Anxa2,Fgr,Il1b,Lgals3,Axl,Syne1,Hip1
11_Member	GO Biological Processes	GO:0007596	blood coagulation	-3.42548	-1.40247	6/157	Anxa5,Apoe,Anxa2,F5,Axl,F13a1
11_Member	GO Biological Processes	GO:0007599	hemostasis	-3.39618	-1.39618	6/159	Anxa5,Apoe,Anxa2,F5,Axl,F13a1
11_Member	GO Biological Processes	GO:0050817	coagulation	-3.38169	-1.38386	6/160	Anxa5,Apoe,Anxa2,F5,Axl,F13a1
11_Member	GO Biological Processes	GO:0060627	regulation of vesicle-mediated transport	-3.20939	-1.25771	11/566	Apoe,Anxa2,Ccr2,Fgr,Il1b,Lgals3,Rab3d,Ezr,Axl,Syne1,Hip1
11_Member	GO Biological Processes	GO:0045807	positive regulation of endocytosis	-3.20242	-1.25248	6/173	Apoe,Anxa2,Il1b,Axl,Syne1,Hip1
11_Member	GO Molecular Functions	GO:0005543	phospholipid binding	-3.01808	-1.11442	9/418	Anxa5,Apoe,Anxa2,Plcb1,Axl,Pla2g7,Hip1,Myof,Iqgap2
11_Member	GO Biological Processes	GO:0050878	regulation of body fluid levels	-2.95476	-1.07102	8/343	Anxa5,Apoe,Anxa2,F5,Ptger4,Xdh,Axl,F13a1
11_Member	GO Biological Processes	GO:0051099	positive regulation of binding	-2.82155	-0.962546	6/205	Ace,Apoe,Anxa2,Lgals3,Rara,Hmgb2
11_Member	GO Biological Processes	GO:0050435	amyloid-beta metabolic process	-2.6591	-0.860733	3/43	Ace,Apoe,Olfm1
11_Member	GO Biological Processes	GO:0030195	negative regulation of blood coagulation	-2.49642	-0.733477	3/49	Anxa5,Apoe,Anxa2
11_Member	GO Biological Processes	GO:1900047	negative regulation of hemostasis	-2.47143	-0.716361	3/50	Anxa5,Apoe,Anxa2
11_Member	GO Biological Processes	GO:0050819	negative regulation of coagulation	-2.447	-0.69525	3/51	Anxa5,Apoe,Anxa2
11_Member	GO Biological Processes	GO:0032092	positive regulation of protein binding	-2.37168	-0.640438	4/109	Ace,Apoe,Anxa2,Lgals3
11_Member	GO Biological Processes	GO:0097006	regulation of plasma lipoprotein particle levels	-2.22827	-0.529514	3/61	Apoe,Anxa2,Pla2g7
11_Member	GO Biological Processes	GO:0061045	negative regulation of wound healing	-2.04621	-0.406794	3/71	Anxa5,Apoe,Anxa2
12_Summary	GO Biological Processes	GO:0006954	inflammatory response	-6.08857	-3.53482	17/690	Ace,Adam8,Apoe,Ciita,Cd44,Ccr2,Cybb,Fn1,Hp,Il1b,Pstpip1,Ptger4,Sema7a,Axl,Pla2g7,Mefv,Hmgb2,Anxa5,Anxa2,Fgl2,Cd74,Ptpn22,Treml4,Samhd1
12_Member	GO Biological Processes	GO:0006954	inflammatory response	-6.08857	-3.53482	17/690	Ace,Adam8,Apoe,Ciita,Cd44,Ccr2,Cybb,Fn1,Hp,Il1b,Pstpip1,Ptger4,Sema7a,Axl,Pla2g7,Mefv,Hmgb2
12_Member	GO Biological Processes	GO:0032101	regulation of response to external stimulus	-5.43581	-2.97049	17/771	Ace,Adam8,Anxa5,Apoe,Anxa2,Cd44,Ccr2,Fgl2,Fn1,Cd74,Il1b,Ptger4,Ptpn22,Sema7a,Pla2g7,Mefv,Treml4
12_Member	GO Biological Processes	GO:0050727	regulation of inflammatory response	-3.51779	-1.46611	9/356	Ace,Adam8,Apoe,Cd44,Ccr2,Il1b,Ptger4,Sema7a,Mefv
12_Member	GO Biological Processes	GO:0032102	negative regulation of response to external stimulus	-3.0038	-1.10482	8/337	Anxa5,Apoe,Anxa2,Cd44,Fgl2,Ptger4,Sema7a,Mefv
12_Member	GO Biological Processes	GO:0031348	negative regulation of defense response	-2.69674	-0.884625	6/217	Apoe,Cd44,Fgl2,Ptger4,Mefv,Samhd1
13_Summary	GO Molecular Functions	GO:0044548	S100 protein binding	-6.07014	-3.52334	4/13	Anxa2,S100a6,Ezr,Ahnak,Anxa5,Plec,Atp1a3,Ace,Fn1,Gbp2,Cd74,Mbp,Plcb1
13_Member	GO Molecular Functions	GO:0044548	S100 protein binding	-6.07014	-3.52334	4/13	Anxa2,S100a6,Ezr,Ahnak
13_Member	GO Cellular Components	GO:0042383	sarcolemma	-3.33885	-1.3582	6/163	Anxa5,Anxa2,Plec,Ezr,Ahnak,Atp1a3
13_Member	GO Cellular Components	GO:0043230	extracellular organelle	-3.21919	-1.26222	5/113	Ace,Anxa2,Fn1,Gbp2,Ahnak
13_Member	GO Cellular Components	GO:0070062	extracellular exosome	-2.67172	-0.867166	4/90	Ace,Anxa2,Fn1,Ahnak
13_Member	GO Cellular Components	GO:1903561	extracellular vesicle	-2.53732	-0.762894	4/98	Ace,Anxa2,Fn1,Ahnak
13_Member	GO Biological Processes	GO:0048146	positive regulation of fibroblast proliferation	-2.08023	-0.426055	3/69	Anxa2,Fn1,Cd74
13_Member	GO Cellular Components	GO:0043209	myelin sheath	-2.02976	-0.392895	5/213	Anxa2,Mbp,Plcb1,Ezr,Atp1a3
14_Summary	GO Cellular Components	GO:0099513	polymeric cytoskeletal fiber	-5.59424	-3.11143	16/668	Apoe,Aspm,Gas7,Kcnab2,Lmnb1,Plec,Pstpip1,Rab3d,Ezr,Vim,Mefv,Krt80,Flna,Tpm4,Kif14,Iqgap2
14_Member	GO Cellular Components	GO:0099513	polymeric cytoskeletal fiber	-5.59424	-3.11143	16/668	Apoe,Aspm,Gas7,Kcnab2,Lmnb1,Plec,Pstpip1,Rab3d,Ezr,Vim,Mefv,Krt80,Flna,Tpm4,Kif14,Iqgap2
14_Member	GO Cellular Components	GO:0005882	intermediate filament	-2.13846	-0.466263	4/127	Lmnb1,Plec,Vim,Krt80
15_Summary	GO Cellular Components	GO:0098797	plasma membrane protein complex	-5.32704	-2.88938	14/541	Adam8,Alcam,Cybb,H2-Aa,H2-Ab1,H2-Eb1,Cd74,Itgal,Itgb7,Kcnab2,Tgfbr3,Olfm1,Hip1,Atp1a3,Cd44,Flt1,Axl
15_Member	GO Cellular Components	GO:0098797	plasma membrane protein complex	-5.32704	-2.88938	14/541	Adam8,Alcam,Cybb,H2-Aa,H2-Ab1,H2-Eb1,Cd74,Itgal,Itgb7,Kcnab2,Tgfbr3,Olfm1,Hip1,Atp1a3
15_Member	GO Cellular Components	GO:0043235	receptor complex	-3.19166	-1.24346	9/395	Alcam,Cd44,Flt1,Cd74,Itgal,Itgb7,Tgfbr3,Axl,Olfm1
16_Summary	GO Biological Processes	GO:0002286	T cell activation involved in immune response	-5.2151	-2.79394	7/115	Ccr2,Fgl2,Itgal,Lgals3,Ptger4,Rara,Clec4e,Gapt,Fgr,Runx3,Cd44,H2-Ab1,Ptpn22,Adam8,Cybb,Axl,Il1b,Cd74
16_Member	GO Biological Processes	GO:0002286	T cell activation involved in immune response	-5.2151	-2.79394	7/115	Ccr2,Fgl2,Itgal,Lgals3,Ptger4,Rara,Clec4e
16_Member	GO Biological Processes	GO:0002285	lymphocyte activation involved in immune response	-4.6409	-2.3076	8/194	Ccr2,Fgl2,Itgal,Lgals3,Ptger4,Rara,Clec4e,Gapt
16_Member	GO Biological Processes	GO:0002366	leukocyte activation involved in immune response	-4.43852	-2.15308	9/269	Ccr2,Fgl2,Fgr,Itgal,Lgals3,Ptger4,Rara,Clec4e,Gapt
16_Member	GO Biological Processes	GO:0002263	cell activation involved in immune response	-4.38866	-2.11071	9/273	Ccr2,Fgl2,Fgr,Itgal,Lgals3,Ptger4,Rara,Clec4e,Gapt
16_Member	GO Biological Processes	GO:0046634	regulation of alpha-beta T cell activation	-4.3388	-2.07902	6/107	Runx3,Cd44,Ccr2,H2-Ab1,Ptpn22,Rara
16_Member	GO Biological Processes	GO:0046631	alpha-beta T cell activation	-4.28471	-2.03548	7/160	Runx3,Cd44,Ccr2,H2-Ab1,Ptger4,Ptpn22,Rara
16_Member	GO Biological Processes	GO:1903555	regulation of tumor necrosis factor superfamily cytokine production	-4.23359	-2.0014	7/163	Adam8,Ccr2,Cybb,Ptger4,Ptpn22,Rara,Axl
16_Member	GO Biological Processes	GO:0046635	positive regulation of alpha-beta T cell activation	-4.22454	-1.99567	5/69	Runx3,Ccr2,H2-Ab1,Ptpn22,Rara
16_Member	GO Biological Processes	GO:0071706	tumor necrosis factor superfamily cytokine production	-4.16709	-1.95606	7/167	Adam8,Ccr2,Cybb,Ptger4,Ptpn22,Rara,Axl
16_Member	GO Biological Processes	GO:0002292	T cell differentiation involved in immune response	-4.10687	-1.91594	5/73	Ccr2,Fgl2,Ptger4,Rara,Clec4e
16_Member	GO Biological Processes	GO:0032609	interferon-gamma production	-4.00137	-1.83707	6/123	Runx3,Ccr2,Il1b,Ptpn22,Rara,Axl
16_Member	GO Biological Processes	GO:0035710	CD4-positive, alpha-beta T cell activation	-3.42308	-1.40247	5/102	Runx3,Cd44,Ccr2,Ptger4,Rara
16_Member	GO Biological Processes	GO:0032680	regulation of tumor necrosis factor production	-3.3673	-1.37527	6/161	Ccr2,Cybb,Ptger4,Ptpn22,Rara,Axl
16_Member	GO Biological Processes	GO:0032640	tumor necrosis factor production	-3.32477	-1.34599	6/164	Ccr2,Cybb,Ptger4,Ptpn22,Rara,Axl
16_Member	GO Biological Processes	GO:0032720	negative regulation of tumor necrosis factor production	-3.30357	-1.33182	4/61	Ptger4,Ptpn22,Rara,Axl
16_Member	GO Biological Processes	GO:1903556	negative regulation of tumor necrosis factor superfamily cytokine production	-3.27661	-1.30705	4/62	Ptger4,Ptpn22,Rara,Axl
16_Member	GO Biological Processes	GO:0032649	regulation of interferon-gamma production	-3.27249	-1.30588	5/110	Ccr2,Il1b,Ptpn22,Rara,Axl
16_Member	GO Biological Processes	GO:2000514	regulation of CD4-positive, alpha-beta T cell activation	-3.17338	-1.22864	4/66	Runx3,Cd44,Ccr2,Rara
16_Member	GO Biological Processes	GO:0002828	regulation of type 2 immune response	-3.07495	-1.16339	3/31	Ccr2,Cd74,Rara
16_Member	GO Biological Processes	GO:0042092	type 2 immune response	-2.84865	-0.982523	3/37	Ccr2,Cd74,Rara
16_Member	GO Biological Processes	GO:0043367	CD4-positive, alpha-beta T cell differentiation	-2.80091	-0.950318	4/83	Runx3,Ccr2,Ptger4,Rara
16_Member	GO Biological Processes	GO:0043277	apoptotic cell clearance	-2.6591	-0.860733	3/43	Ccr2,Rara,Axl
16_Member	GO Biological Processes	GO:0046638	positive regulation of alpha-beta T cell differentiation	-2.49642	-0.733477	3/49	Runx3,Ccr2,Rara
16_Member	GO Biological Processes	GO:0043370	regulation of CD4-positive, alpha-beta T cell differentiation	-2.42308	-0.678999	3/52	Runx3,Ccr2,Rara
16_Member	GO Biological Processes	GO:0046632	alpha-beta T cell differentiation	-2.28925	-0.5806	4/115	Runx3,Ccr2,Ptger4,Rara
16_Member	GO Biological Processes	GO:0042093	T-helper cell differentiation	-2.1517	-0.47488	3/65	Ccr2,Ptger4,Rara
16_Member	GO Biological Processes	GO:0002294	CD4-positive, alpha-beta T cell differentiation involved in immune response	-2.13338	-0.463864	3/66	Ccr2,Ptger4,Rara
16_Member	GO Biological Processes	GO:0002293	alpha-beta T cell differentiation involved in immune response	-2.11537	-0.45116	3/67	Ccr2,Ptger4,Rara
16_Member	GO Biological Processes	GO:0002287	alpha-beta T cell activation involved in immune response	-2.09765	-0.43815	3/68	Ccr2,Ptger4,Rara
16_Member	GO Biological Processes	GO:0046637	regulation of alpha-beta T cell differentiation	-2.04621	-0.406794	3/71	Runx3,Ccr2,Rara
17_Summary	GO Biological Processes	GO:0002291	T cell activation via T cell receptor contact with antigen bound to MHC molecule on antigen presenti	-5.13787	-2.73622	3/7	Fgl2,Itgal,Lgals3,Alcam,Ezr,Ptpn22,Rftn1
17_Member	GO Biological Processes	GO:0002291	T cell activation via T cell receptor contact with antigen bound to MHC molecule on antigen presenti	-5.13787	-2.73622	3/7	Fgl2,Itgal,Lgals3
17_Member	GO Cellular Components	GO:0001772	immunological synapse	-4.10675	-1.91594	4/38	Alcam,Itgal,Lgals3,Ezr
17_Member	GO Biological Processes	GO:0050860	negative regulation of T cell receptor signaling pathway	-3.71852	-1.60538	3/19	Lgals3,Ptpn22,Ezr
17_Member	GO Biological Processes	GO:0050858	negative regulation of antigen receptor-mediated signaling pathway	-3.3032	-1.33182	3/26	Lgals3,Ptpn22,Ezr
17_Member	GO Biological Processes	GO:0050856	regulation of T cell receptor signaling pathway	-2.7189	-0.896509	3/41	Lgals3,Ptpn22,Ezr
17_Member	GO Biological Processes	GO:0050854	regulation of antigen receptor-mediated signaling pathway	-2.31063	-0.592885	3/57	Lgals3,Ptpn22,Ezr
17_Member	GO Biological Processes	GO:0050852	T cell receptor signaling pathway	-2.15037	-0.474482	4/126	Lgals3,Ptpn22,Ezr,Rftn1
18_Summary	GO Biological Processes	GO:0007229	integrin-mediated signaling pathway	-4.7934	-2.45586	6/89	Fgr,Itgal,Itgb7,Sema7a,Vav3,Flna,Apoe,Syne1,Rftn1,Anxa2,Lgals3,Rab3d,Ezr
18_Member	GO Biological Processes	GO:0007229	integrin-mediated signaling pathway	-4.7934	-2.45586	6/89	Fgr,Itgal,Itgb7,Sema7a,Vav3,Flna
18_Member	GO Biological Processes	GO:0043113	receptor clustering	-3.12432	-1.19482	4/68	Apoe,Itgal,Itgb7,Flna
18_Member	GO Biological Processes	GO:0051668	localization within membrane	-3.02626	-1.11946	6/187	Apoe,Itgal,Itgb7,Syne1,Rftn1,Flna
18_Member	GO Biological Processes	GO:0072657	protein localization to membrane	-2.257	-0.5553	9/543	Apoe,Anxa2,Itgal,Itgb7,Lgals3,Rab3d,Ezr,Rftn1,Flna
19_Summary	GO Molecular Functions	GO:0001540	amyloid-beta binding	-4.55493	-2.2341	5/59	Apoe,Cd74,Pirb,Olfm1,Atp1a3,Anxa5,Gsr,H2-Aa,H2-Ab1,Fn1,Cd44,Vcan,Tgfbr3
19_Member	GO Molecular Functions	GO:0001540	amyloid-beta binding	-4.55493	-2.2341	5/59	Apoe,Cd74,Pirb,Olfm1,Atp1a3
19_Member	GO Molecular Functions	GO:0042277	peptide binding	-4.00806	-1.8409	9/306	Anxa5,Apoe,Gsr,H2-Aa,H2-Ab1,Cd74,Pirb,Olfm1,Atp1a3
19_Member	GO Molecular Functions	GO:0033218	amide binding	-3.37875	-1.38286	9/372	Anxa5,Apoe,Gsr,H2-Aa,H2-Ab1,Cd74,Pirb,Olfm1,Atp1a3
19_Member	GO Molecular Functions	GO:0043394	proteoglycan binding	-2.84865	-0.982523	3/37	Apoe,Fn1,Atp1a3
19_Member	GO Molecular Functions	GO:0005539	glycosaminoglycan binding	-2.75806	-0.917077	6/211	Anxa5,Apoe,Cd44,Vcan,Fn1,Tgfbr3
19_Member	GO Molecular Functions	GO:1901681	sulfur compound binding	-2.39303	-0.656489	6/250	Anxa5,Apoe,Fn1,Gsr,Tgfbr3,Atp1a3
20_Summary	GO Cellular Components	GO:0031012	extracellular matrix	-4.53701	-2.22025	12/474	Adam19,Anxa5,Apoe,Anxa2,Vcan,Fn1,Lgals3,S100a11,S100a6,Tgfbr3,F13a1,Emilin2,Adam8,Capn2,Cd93,Plcb1,Adgre5,Clec4e
20_Member	GO Cellular Components	GO:0031012	extracellular matrix	-4.53701	-2.22025	12/474	Adam19,Anxa5,Apoe,Anxa2,Vcan,Fn1,Lgals3,S100a11,S100a6,Tgfbr3,F13a1,Emilin2
20_Member	GO Cellular Components	GO:0062023	collagen-containing extracellular matrix	-4.20151	-1.9857	10/359	Adam19,Anxa5,Anxa2,Vcan,Fn1,Lgals3,S100a11,S100a6,F13a1,Emilin2
20_Member	GO Molecular Functions	GO:0005509	calcium ion binding	-2.95619	-1.07102	11/608	Adam8,Anxa5,Anxa2,Capn2,Vcan,Cd93,Plcb1,S100a11,S100a6,Adgre5,Clec4e
20_Member	GO Molecular Functions	GO:0048306	calcium-dependent protein binding	-2.04621	-0.406794	3/71	Anxa2,S100a11,S100a6
